# Supplementary material
Source: publisher figshare collection journal article supplement (https://sage.figshare.com/ndownloader/files/13894430)
Supplement: Supplementary file 1 [file 13894430]

Supplemental Table 12. Zero-order correlations between key variables from Study 5. BAQ = Brief Aggression Questionnaire, NTS = Need Threat Scale, SSIS = Short Sadistic Impulse Scale, VDAT = Voodoo Doll Aggression Task. Gender is coded: male = 1, female = -1. 'Pre', 'During', and 'Post' refer to before, during, and after participants completed the aggression measure, respectively. \* $p < .05$ , \*\* $p < .01$ , \*\*\* $p < .001$

|                                   | 1      | 2      | 3      | 4     | 5    | 6       | 7      | 8      | 9    | 10 | 11 | 12 |
|-----------------------------------|--------|--------|--------|-------|------|---------|--------|--------|------|----|----|----|
| 1. BAQ - Anger                    |        |        |        |       |      |         |        |        |      |    |    |    |
| 2. BAQ - Hostility                | .54*** |        |        |       |      |         |        |        |      |    |    |    |
| 3. BAQ - Physical Aggression      | .44*** | .44*** |        |       |      |         |        |        |      |    |    |    |
| 4. BAQ - Verbal Aggression        | .39*** | .41*** | .51*** |       |      |         |        |        |      |    |    |    |
| 5. Gender                         | .19*   | .08    | .28*** | .23** |      |         |        |        |      |    |    |    |
| 6. NTS - Negative Affect (Pre)    | .31*** | .29*** | .15    | -.01  | -.01 |         |        |        |      |    |    |    |
| 7. NTS - Positive Affect (Pre)    | -.10   | -.16   | -.05   | .13   | .11  | -.61*** |        |        |      |    |    |    |
| 8. NTS - Negative Affect (During) | .12    | .05    | .07    | .08   | .05  | .19*    | .08    |        |      |    |    |    |
| 9. NTS - Positive Affect (During) | .15    | .20*   | .21**  | .13   | .12  | .23**   | .00    | -.24** |      |    |    |    |
| 10. NTS - Negative Affect (Post)  | .42*** | .33*** | .25**  | .17*  | .07  | .66***  | -.23** | .40*** | .18* |    |    |    |

|                                  |        |        |        |        |     |         |        |       |        |         |      |        |
|----------------------------------|--------|--------|--------|--------|-----|---------|--------|-------|--------|---------|------|--------|
| 11. NTS - Positive Affect (Post) | -.11   | -.07   | .06    | .11    | .12 | -.35*** | .59*** | -.18* | .32*** | -.33*** |      |        |
| 12. SSIS                         | .55*** | .52*** | .43*** | .37*** | .10 | .35***  | -.12   | .04   | .30*** | .41***  | -.02 |        |
| 13. VDAT (Log Transformed)       | .27**  | .38*** | .29**  | .09    | .02 | .43***  | -.25** | .02   | .44*** | .41***  | -.00 | .46*** |

---
